# Supplementary material for: Melatonin Efficacy in Obese Leptin-Deficient Mice Heart
Source: MDPI journal article supplement (doi:10.3390/nu9121323), 2017-12-05
Supplement: s1 [file s1]

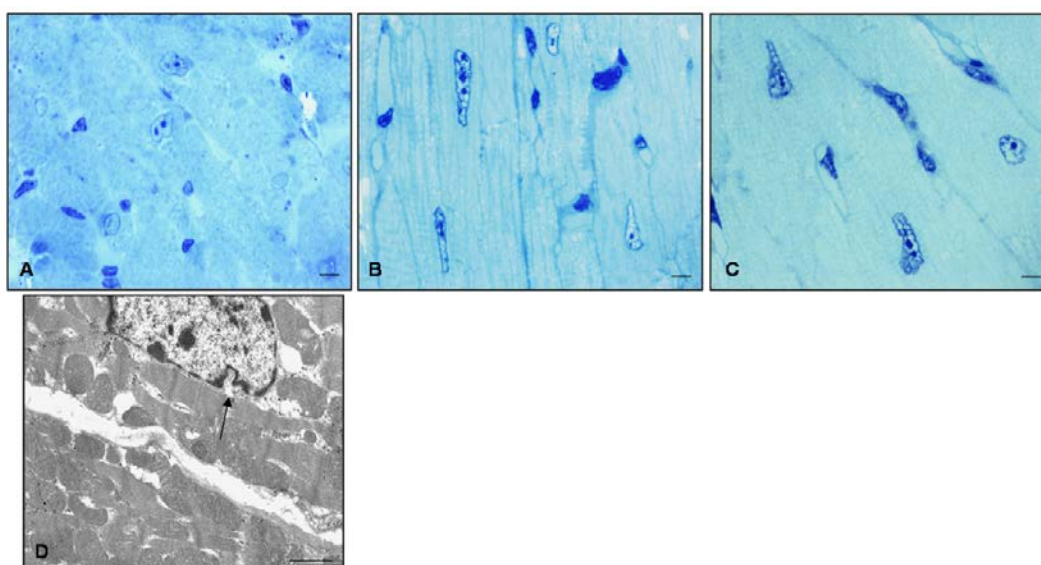

**Figure S1.** Nuclear cardiomyocytes morphology and ultrastructure. Photomicrographs showing ventricular cardiomyocytes in lean mice (A), *ob/ob* mice (B) and *ob/ob* mice treated with melatonin (C) presented different nuclear size and contour. Semithin sections stained by methylene blue-azur II. Ultrastructural evidence of nuclear indentations (arrow) in lean mice (D). Scale bars = A–C: 20  $\mu$ m; D: 1  $\mu$ m.

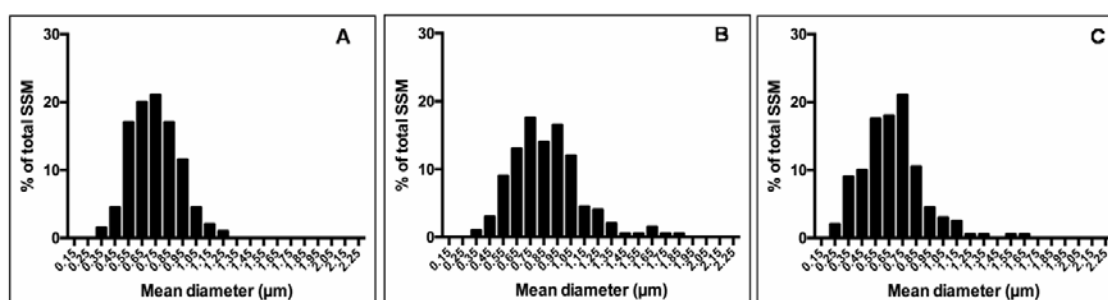

**Figure S2.** Heart sub-sarcolemmal mitochondrial features. The graphs summarize the SSM mitochondria diameter and distribution along size-classes of lean mice (A), *ob/ob* mice (B) and *ob/ob* mice treated with melatonin (C).
